# Supplementary material for: Synthesis, structural and optical properties of nanocrystalline Ba2NaNb5O15
Source: Royal Society of Chemistry journal article supplement (doi:10.1039/c3ce41250d), 2013-01-01
Supplement: c3ce41250d.pdf [file c3ce41250d.pdf]

Supplementary Information for

# Synthesis, structural and optical properties of nanocrystalline $\text{Ba}_2\text{NaNb}_5\text{O}_{15}$

Swarup Kundu<sup>a</sup> and K. B. R. Varma<sup>a,b</sup>

<sup>a, b</sup>Materials Research Centre, Indian Institute of Science, Bangalore -560012, India  
Fax: +91-80-2360 0683; Tel: +91 080 2293 2914;

\*E-mail:kbrvarma@mrc.iisc.ernet.in

Crystallite size distributions:

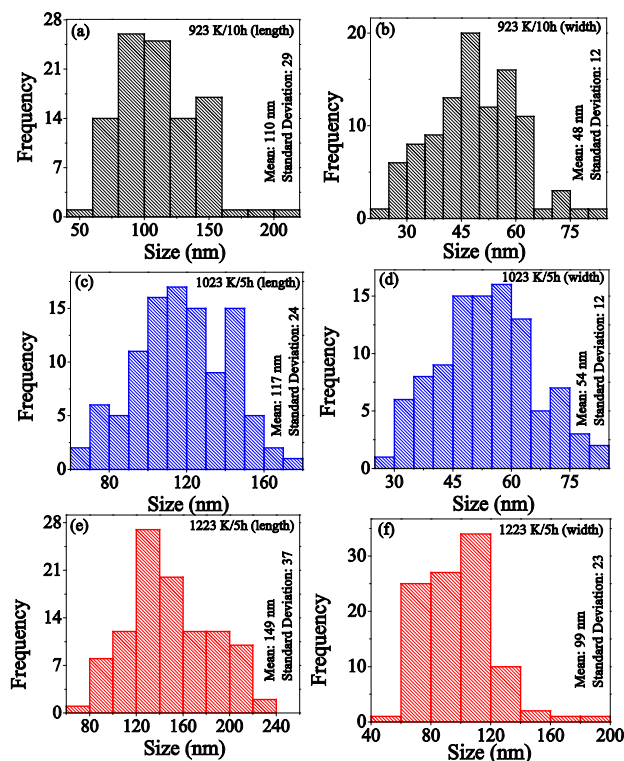

Fig. S1 Crystallite size distributions of  $\text{Ba}_2\text{NaNb}_5\text{O}_{15}$  nano crystallites when the precursor powders were heat-treated at different temperatures and durations (Calculated from SEM images).

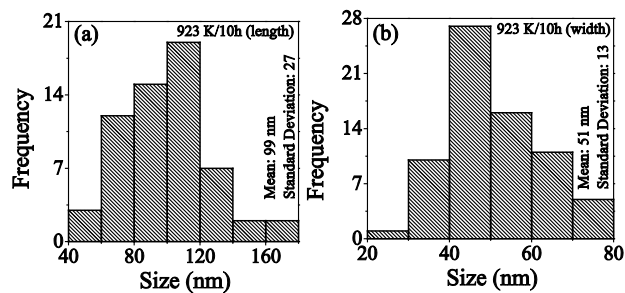

Fig. S2 Crystallite size distributions (length and width) of  $\text{Ba}_2\text{NaNb}_5\text{O}_{15}$  nano crystallites for the sample heat-treated at 923 K/10h (Calculated from TEM images).
